# Supplementary material for: Occurrence, Antimicrobial Resistance, and Virulence Profiles of Salmonella Serovars Isolated from Wild Reptiles in South Africa
Source: Int J Microbiol. 2024 Jan 5;2024:5213895. doi: 10.1155/2024/5213895 (PMC10787053; doi:10.1155/2024/5213895)
Supplement: Supplementary Materials — Supplementary Table S1. Oligonucleotide primers used for detection of virulence associated genes of Salmonella isolates. Supplementary Table S2. List of antibiotic resistance genes primers and conditions used in this study. [file 5213895.f1.docx]

**Occurrence, antimicrobial resistance and virulence profiles of *Salmonella* serovars isolated from wild reptiles in South Africa**

Lungile N. Mlangeni1, Tsepo Ramatla1,2*, Kgaugelo E. Lekota1, Cormac Price1, Oriel Thekisoe1, Che Weldon1

1Unit for Environmental Sciences and Management, North-West University, Potchefstroom, 2531, South Africa

2Gastrointestinal Research Unit, Department of Surgery, School of Clinical Medicine, University of the Free State, Bloemfontein 9300, South Africa

Correspondence should be addressed to Tsepo Ramatla, Email: [ra21205450@gmail.com](mailto:ra21205450@gmail.com)

**Supplementary Table S1.** Oligonucleotide primers used for detection of virulence associated genes of *Salmonella* isolates.

| **Gene** | **Location** | **Primer name** | **Primer sequence (5′-3′)** | **Length (bp)** | **Annealing temp (°C)** | **References** |
| --- | --- | --- | --- | --- | --- | --- |
| *hilA* | SPI-1 | hilA-F  hilA-R | GACAGAGCTGGACCACAATAAGACA  GAGCGTAATTCATCGCCTAAAC | 312 | 55°C | [1] |
| *sipB* | SPI-1 | sipB-F  sipB-R | GGACGCCGCCCGGGAAAAACTCTC  ACACTCCCGTCGCCGCCTTCACAA | 875 | 66.5°C | [2] |
| *prgH* | SPI-1 | prgH-F  prgH-R | CTTCAGGYCAACTCCCTGATATAC  CCCTTGAGCCAGTCATCTTT | 961 | 55°C | [1] |
| *ssrB* | SPI-2 | ssrB-F  ssrB-R | CTCATTCTTCGGGCACAGTTA  CCTTATTACCCTGGCCTCATTT | 558 | 55°C | [1] |
| *marT* | SPI-3 | marT- F  marT-R | CGTCGTCTCACAACAAACATTC  CTGACAAATCAATGCCGTAACC | 556 | 55°C | [1] |
| *mgtC* | SPI-3 | mgtC-F  mgtC-R | AAAGACAATGGCGTCAACGTATGG  TTCTTTATAGCCCTGTTCCTGAGC | 500 | 65°C | [1] |
| *sopB* | SPI-5 | sopB-F  sopB-R | TCACTAAAAACCCAGGAGGCTTTT  CGCCATCTTTATTGCGGATTTTTA | 1000 | 65°C | [1] |
| *pagN* | SPI-6 | pagN-F  pagN-R | TTCCAGCTTCCAGTACGTTTAG  GCCTTTGTGTCTGCATCATAAG | 440 | 55°C | [1] |
| *vexA* | SPI-7 | vexA-F  vexA-R | AAACTAAGCGCTCCCGATAC  CAGTCGCGCAGTGAAATAATG | 504 | 55°C | [1] |
| *nlpI* | SPI-8 | nlpI-F  nlpI-R | AGTCTTGGTTTGAGGGCATTAG  TTCTTTCGCCTGCTTCTCATTA | 333 | 55°C | [1] |
| *bapA* | SPI-9 | bapA-F  bapA-R | TAAGCGTCGGACTTGGAATG  CGTTCTTCAGCGTGTAGGTATAG | 543 | 55°C | [1] |
| *pagC* | SPI-11 | pagC-F  pagC-R | CGCCTTTTCCGTGGGGTATGC  GAAGCCGTTTATTTTTGTAGAGGAGATGTT | 454 | 66.5°C | [2] |
| *oafA* | SPI-12 | oafA-F  oafA-R | CGAGTGACTGGAACCAAAGA  CAAGCATAGAGCCAGAGTAGAG | 510 | 55°C | [1] |
| *spvB* | Plasmid | spvB-F  spvB-R | CTATCAGCCCCGCACGGAGAGCAGTTTTTA  GGAGGAGGCGGTGGCGGTGGCATCATA | 717 | 66.5°C | [1] |
| *pefA* | Plasmid | pefA-F  pefA-R | GCGCCGCTCAGCCGAACCAG  GCAGCAGAAGCCCAGGAAACAGTG | 157 | 66.5°C | [1] |
| *spvR* | Plasmid | spvR-F  spvR-R | CCGCTGAGCAGGGTTATTT  CTTGGTCGGGTAATACAAGGAG | 723 | 55°C | [1] |
| *cdtB* | Genome | cdtB-F  cdtB-R | ACAACTGTCGCATCTCGCCCCGTCATT  CAATTTGCGTGGGTTCTGTAGGTGCGAGT | 268 | 66.5°C | [1] |

**Supplementary Table S2.** List of antibiotic resistance genes primers and conditions used in this study.

| **Class and Target gene** | **Primer** | **Primer sequence (5´ → 3´)** | **Amplicon size (bp)** | **Annealing temp (°C)** | **References** |
| --- | --- | --- | --- | --- | --- |
| **Quinolone** |  |  |  |  |  |
| *qnr*A | qnrA-F  qnrA-R | ATTTCTCACGCCAGGATTTG  GAGATTGGCATTGCTCCAGT | 413 | 56 | [3] |
| *qnrS* | qnrS-F  qnrS-R | CCCCATGCCCGAAGTTATCA  ACTGCTTGGAGTGTGTTGGT | 457 |  | [3] |
| *par*C | parC-F  parC-R | GCCTAAACAACGCACGGAAA  TGACACGGGAGGTAACCAGA | 432 | 59 | [3] |
| *aac(6**ˊ)-Ib-cr* | aac(6ˊ)-Ib-cr-F  aac(6ˊ)-Ib-cr-R | ATATGCGGATCCAATGAGCAACGCAAAAACAAAGTTAG  ATAGCGAATTCTTAGGCATCACTGCGTGTTCGCT | 544 | 66 | [4] |
| **Aminoglycoside** |  |  |  |  |  |
| *str*A | strA-F  strA-R | CTTGGTGATAACGGCAATTC  CCAATCGCAGATAGAAGGC | 548 | 55 | [5] |
| *str*B | strB-F  strB-R | ATCGTCAAGGGATTGAAACC  GGATCGTAGAACATATTGGC | 509 | 56 | [5] |
| *aac(*6ˊ)*-*Ib | aac(6ˊ)-Ib-F  aac(6ˊ)-Ib-R | TATGAGTGGCTAAATCGAT  CCCGCTTTCTCGTAGCA | 395 | 55 | [4] |

**References**

1. M. Yue, X. Li, D.Liu, and X. Hu, “Serotypes, antibiotic resistance, and virulence genes of *Salmonella* in children with diarrhea”. *Journal of Clinical Laboratory Analysis*, vol. 34, pp. e23525, 2020.
2. H. P. Xiong, M. Tang, and H. P. Zhang, “The preliminary study about distribution features of *Salmonella* virulence genes in Nantong city”. *Journal of Qiqihar Medical College*, vol, 30, no. 19, pp. 2355-2357, 2009.
3. J. Xu, Y. Xu, H. Wang, C. Guo, H. Qiu, Y. He, Y. Zhang, and X. Li, W, “Occurrence of antibiotics and antibiotic resistance genes in a sewage treatment plant and its effluent-receiving river”. *Chemosphere*, vol. 119, pp. 1379-1385, 2015.
4. S. F. Huang, W. Dai, S. Sun, X. J. Zhang, and L. P. Zhang, “Prevalence of plasmid-mediated quinolone resistance and aminoglycoside resistance seterminats among carbapeneme non-susceptible”. *Enterobacter cloacae*. *Plos One*, vol. 7, pp. e47636, 2012.

L. Ouoba, V. Lei, and L. B. Jensen, “Resistance of potential probiotic lactic acid bacteria and bifidobacteria of African and European origin to antimicrobials: Determination and transferability of the resistance genes to other bacteria”. *International Journal of Food Microbiology*, vol. 121, pp. 217 – 224, 2008
